# Supplementary material for: Naked eye sensing of melamine: aggregation induced recognition by sodium d-gluconate stabilised silver nanoparticles
Source: Royal Society of Chemistry journal article supplement (doi:10.1039/c5nj03083h), 2016-01-01
Supplement: c5nj03083h1.pdf [file c5nj03083h1.pdf]

## Supplementary information

### **Naked eye sensing of Melamine: Aggregation induced recognition by Sodium D-gluconate stabilised Silver Nanoparticles**

Palanichamy Kaleeswaran,<sup>a</sup> Thanasekaran Nandhini,<sup>a</sup> Kasi Pitchumani<sup>a,b\*</sup>

<sup>a</sup>*School of Chemistry, Madurai Kamaraj University, Madurai-625 021, India.*

<sup>b</sup>*Centre for green Chemistry Processes, School of Chemistry, Madurai Kamaraj University, Madurai – 625 021.*

**E-mail:** pit12399@yahoo.com

### **CONTENTS**

1. Fig. S1: The calibration curve between  $A_{555}/A_{405}$  and concentration of melamine
2. Fig. S2: HRTEM images of Sdglu-Ag NPs in presence of melamine ( $1 \times 10^{-5}$  M)
3. Fig. S3: HRTEM images of Sdglu-Ag NPs in presence of melamine ( $1 \times 10^{-6}$  M)
4. Fig. S4: HRTEM images of Sdglu-Ag NPs in presence of melamine ( $1 \times 10^{-7}$  M)
5. Fig. S5: Absorbance ratio ( $A_{555}/A_{405}$ ) of Sdglu-Ag NPs with melamine ( $3 \times 10^{-5}$  M) in the presence of various analytes

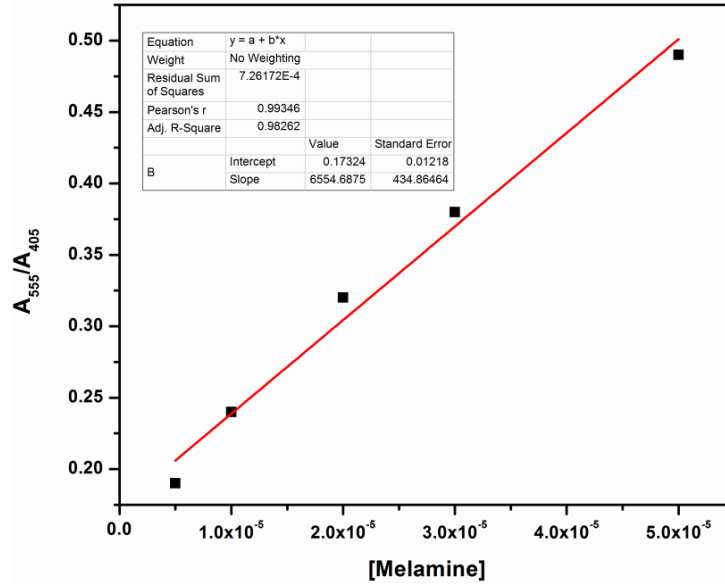

Fig. S1: The calibration curve between  $A_{555}/A_{405}$  and concentration of melamine

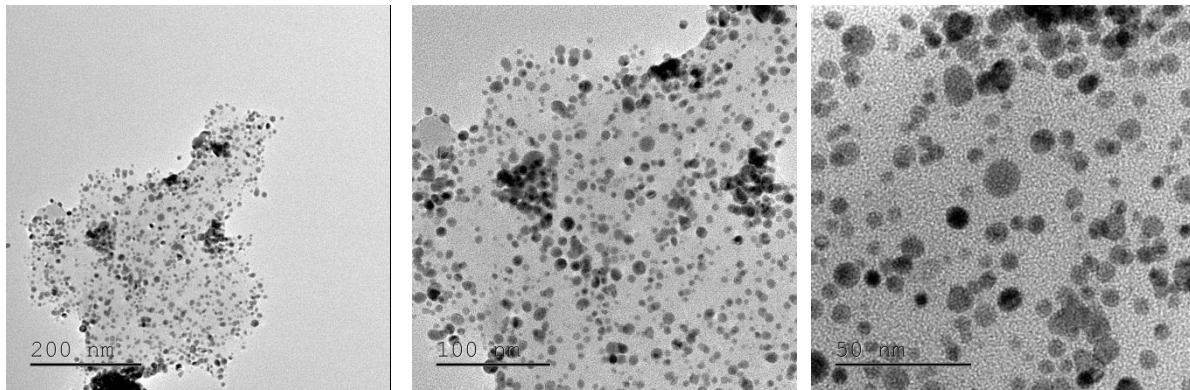

Fig. S2: HRTEM images of Sdglu-Ag NPs in presence of melamine ( $1 \times 10^{-5}$  M)

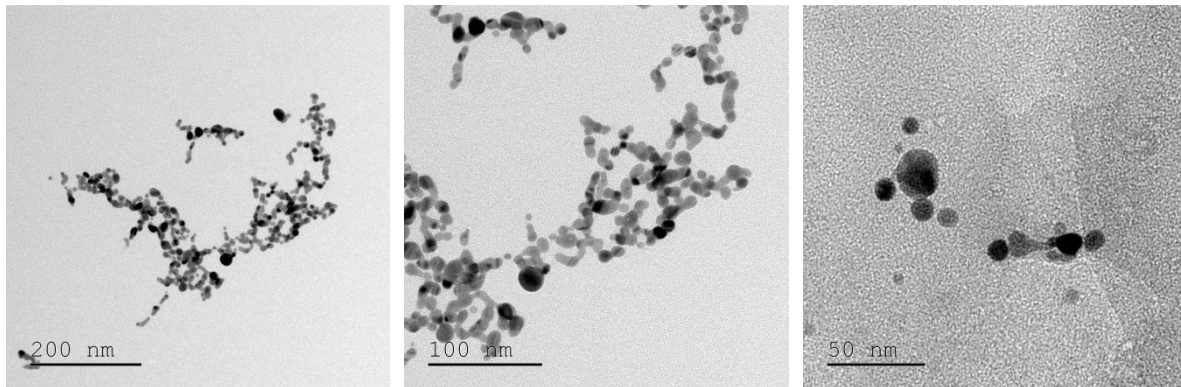

Fig. S3: HRTEM images of Sdglu-Ag NPs in presence of melamine ( $1 \times 10^{-6}$  M)

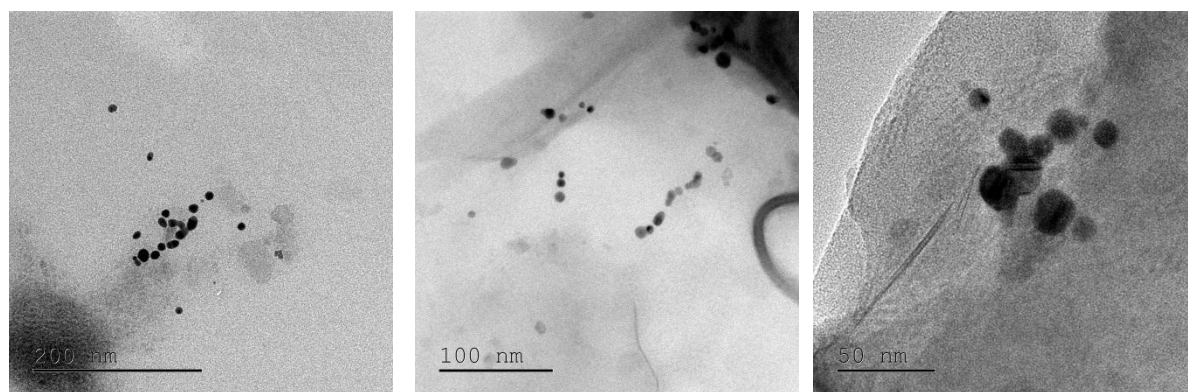

Fig. S4: HRTEM images of Sdglu-Ag NPs in presence of melamine ( $1 \times 10^{-7}$  M)

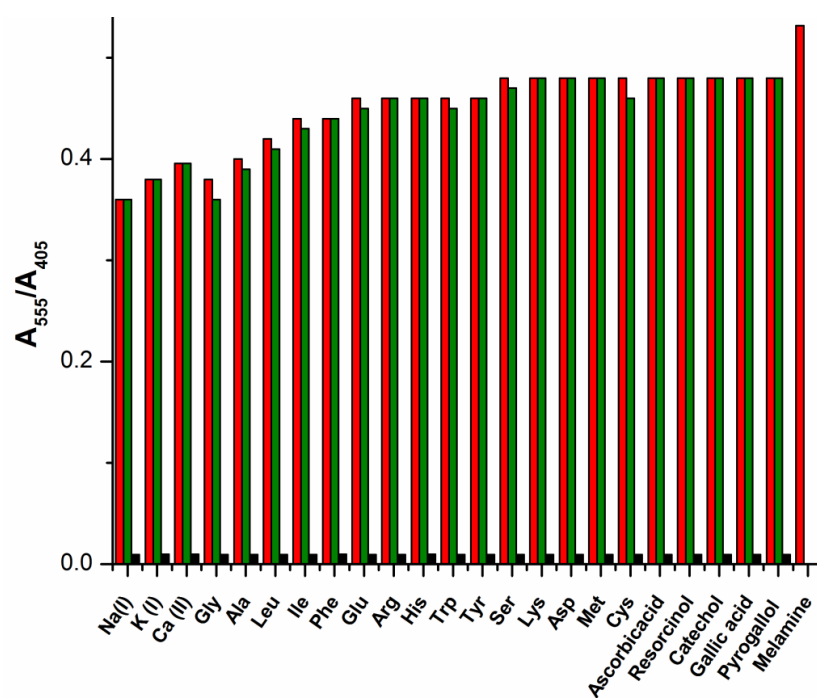

Fig. S5: Absorbance ratio ( $A_{555}/A_{405}$ ) of Sdglu-Ag NPs with melamine ( $3 \times 10^{-5}$  M) in the presence of various analytes [Black bar: various analytes in the absence of melamine; Red bar: various analytes in the presence of melamine ( $3 \times 10^{-5}$  M); Green bar: various analytes in the presence of melamine (100 fold)]
